# Supplementary material for: Gender Bias in Teaching Evaluations
Source: Oxford University Press journal article supplement (doi:10.1093/jeea/jvx057), 2018-02-10
Supplement: jvx057_supp.pdf [file jvx057_supp.pdf]

# ONLINE APPENDIX TO “GENDER BIAS IN TEACHING EVALUATIONS”

**Friederike Mengel**

University of Essex  
and Lund University

**Ulf Zöllitz**

University of Zurich  
and Maastricht University

**Jan Sauermann**

Swedish Institute for Social Research  
(SOFI), Stockholm University

## Appendix A: Figures

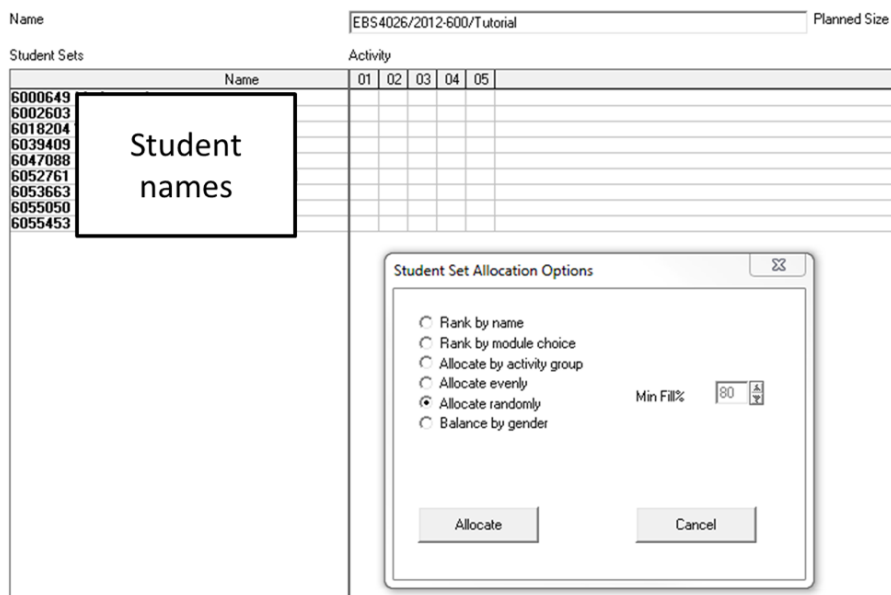

FIGURE A.1. Screenshot of the scheduling software used by the SBE Scheduling Department. figscheduling This screenshot shows the program Syllabus Plus Enterprise Timetable.

E-mail: fr.mengel@gmail.com (Mengel); jan.sauermann@sofi.su.se (Sauermann);  
ulf.zoelitz@econ.uzh.ch (Zöllitz)

**Appendix B: Tables**

TABLE B.1. Gender bias in instructor evaluation – courses without course papers as part of assessment.

|                                                  | (1)                    |
|--------------------------------------------------|------------------------|
| Female instructor ( $\beta_1$ )                  | -0.2443***<br>(0.0399) |
| Female student ( $\beta_2$ )                     | -0.1209***<br>(0.0261) |
| Female instructor * Female student ( $\beta_3$ ) | 0.1661***<br>(0.0439)  |
| Constant                                         | 0.5718**<br>(0.2458)   |
| Observations                                     | 11,014                 |
| R-squared                                        | 0.2023                 |
| $\beta_1 + \beta_3$                              | -0.0783*<br>(0.0467)   |

Note: \*\*\*  $p < 0.01$ , \*\*  $p < 0.05$ , \*  $p < 0.1$ . Dependent variable: Instructor evaluation. All regressions include course fixed effects, parallel course fixed effects for the courses taken at the same time, section size and other control variables for students' characteristics (GPA, grade, nationality, field of study, age). Robust standard errors clustered at the section level are in parentheses.

TABLE B.2. Split sample regressions by student gender.

| Dependent variable          | (1)<br>Instructor evaluation | (2)<br>Group-related  | (3)<br>Material-related | (4)<br>Course-related  | (5)<br>Hours spent  | (6)<br>Final grade    |
|-----------------------------|------------------------------|-----------------------|-------------------------|------------------------|---------------------|-----------------------|
| <i>Female students only</i> |                              |                       |                         |                        |                     |                       |
| Female instructor           | -0.0611<br>(0.0394)          | 0.0182<br>(0.0332)    | -0.0180<br>(0.0284)     | 0.0048<br>(0.0272)     | -0.1787<br>(0.2297) | 0.0153<br>(0.0332)    |
| Constant                    | 0.2355<br>(0.4711)           | -0.2477<br>(0.5204)   | -0.5256<br>(0.3645)     | -1.3169**<br>(0.5684)  | 10.3959<br>(6.6159) | 0.3178<br>(0.7396)    |
| Observations                | 8,673                        | 8,673                 | 8,673                   | 8,673                  | 8,673               | 8,673                 |
| R-squared                   | 0.2547                       | 0.2232                | 0.3025                  | 0.3066                 | 0.2888              | 0.5642                |
| <i>Male students only</i>   |                              |                       |                         |                        |                     |                       |
| Female instructor           | -0.2099***<br>(0.0324)       | -0.0624**<br>(0.0275) | -0.0634**<br>(0.0250)   | -0.0753***<br>(0.0247) | 0.0676<br>(0.1822)  | 0.0300<br>(0.0327)    |
| Constant                    | -0.4334<br>(0.7079)          | 0.1020<br>(0.3236)    | 0.8695*<br>(0.4608)     | 0.0600<br>(0.5945)     | 9.5223<br>(7.2705)  | 2.2006***<br>(0.8279) |
| Observations                | 11,279                       | 11,279                | 11,279                  | 11,279                 | 11,279              | 11,279                |
| R-squared                   | 0.2326                       | 0.2022                | 0.2598                  | 0.2814                 | 0.3102              | 0.5071                |

Note: \*\*\*  $p < 0.01$ , \*\*  $p < 0.05$ , \*  $p < 0.1$ . All regressions include course fixed effects, parallel course fixed effects for the courses taken at the same time, section size and other control variables for students' characteristics (GPA, grade, nationality, field of study, age). Robust standard errors clustered at the section level are in parentheses.

TABLE B.3. Evaluations of graduate student instructors – by separate items.

| Evaluation item                                  | (1)<br>T1              | (2)<br>T2              | (3)<br>T3             | (4)<br>T4              | (5)<br>T5              |
|--------------------------------------------------|------------------------|------------------------|-----------------------|------------------------|------------------------|
| Female instructor ( $\beta_1$ )                  | -0.2180***<br>(0.0668) | -0.2445***<br>(0.0598) | -0.1420**<br>(0.0555) | -0.1913***<br>(0.0627) | -0.1768***<br>(0.0521) |
| Female student ( $\beta_2$ )                     | -0.0576<br>(0.0408)    | -0.0039<br>(0.0396)    | -0.0449<br>(0.0381)   | -0.0406<br>(0.0382)    | -0.0585<br>(0.0373)    |
| Female instructor * Female student ( $\beta_3$ ) | 0.0332<br>(0.0655)     | -0.0598<br>(0.0622)    | -0.0384<br>(0.0579)   | -0.0740<br>(0.0618)    | -0.0109<br>(0.0573)    |
| Observations                                     | 5,340                  | 5,337                  | 5,323                 | 5,346                  | 5,270                  |
| R-squared                                        | 0.2537                 | 0.2559                 | 0.2302                | 0.2475                 | 0.2809                 |
| $\beta_1 + \beta_3$                              | -0.185***<br>(0.0711)  | -0.304***<br>(0.0663)  | -0.180***<br>(0.0611) | -0.265***<br>(0.0701)  | -0.188***<br>(0.0603)  |

Note: \*\*\*  $p < 0.01$ , \*\*  $p < 0.05$ , \*  $p < 0.1$ . All estimates are based on regressions which include course fixed effects, parallel course fixed effects for the courses taken at the same time, section size and other control variables for students' characteristics (GPA, nationality, field of study, age). The sample used in this regression includes graduate student instructors only. Robust standard errors clustered at the section level are in parentheses.

TABLE B.4. Gender bias in students' evaluations – by variation in response items.

|                                                  | (1)<br>Low Dispersion<br>(SD $\leq$ median) | (2)<br>High Dispersion<br>(SD $>$ median) |
|--------------------------------------------------|---------------------------------------------|-------------------------------------------|
| Female instructor ( $\beta_1$ )                  | -0.1718***<br>(0.0301)                      | -0.2283***<br>(0.0478)                    |
| Female student ( $\beta_2$ )                     | -0.0544***<br>(0.0209)                      | -0.1690***<br>(0.0310)                    |
| Female instructor * Female student ( $\beta_3$ ) | 0.0722*<br>(0.0375)                         | 0.1756***<br>(0.0542)                     |
| Constant                                         | -0.5122<br>(0.4368)                         | 0.2878<br>(0.4536)                        |
| Observations                                     | 9,992                                       | 9,960                                     |
| R-squared                                        | 0.2429                                      | 0.2583                                    |
| $\beta_1 + \beta_3$                              | -0.0996***<br>(0.0351)                      | -0.0527<br>(0.0526)                       |

Note: \*\*\*  $p < 0.01$ , \*\*  $p < 0.05$ , \*  $p < 0.1$ . Dependent variable: Instructor evaluation. For defining individuals as “low dispersion” and “high dispersion,” we calculated the standard deviation of a student's answers across all evaluation items within his or her evaluation sheet. Low dispersion (high dispersion) is defined as evaluations with below-median (above-median) standard deviation. All regressions include course fixed effects, parallel course fixed effects for the courses taken at the same time, section size and other control variables for students' characteristics (GPA, grade, nationality, field of study, age). Robust standard errors clustered at the section level are in parentheses.

TABLE B.5. Main results – excluding course coordinators.

| Dependent variable                               | (1)<br>Instructor-related | (2)<br>Group-related | (3)<br>Material-related | (4)<br>Course-related  | (5)<br>Hours spent    | (6)<br>Final grade  |
|--------------------------------------------------|---------------------------|----------------------|-------------------------|------------------------|-----------------------|---------------------|
| Female instructor ( $\beta_1$ )                  | -0.2223***<br>(0.0338)    | -0.0495*<br>(0.0278) | -0.0538**<br>(0.0244)   | -0.0636***<br>(0.0242) | 0.0437<br>(0.1814)    | 0.0069<br>(0.0316)  |
| Female student ( $\beta_2$ )                     | -0.1218***<br>(0.0206)    | -0.0015<br>(0.0211)  | -0.0322<br>(0.0196)     | -0.0399***<br>(0.0192) | 1.4260***<br>(0.1609) | -0.0215<br>(0.0242) |
| Female instructor * Female student ( $\beta_3$ ) | 0.1192***<br>(0.0350)     | 0.0192<br>(0.0337)   | 0.0167<br>(0.0319)      | 0.0469<br>(0.0313)     | -0.1023<br>(0.2562)   | 0.0402<br>(0.0428)  |
| Observations                                     | 16,807                    | 16,807               | 16,807                  | 16,807                 | 16,807                | 16,807              |
| R-squared                                        | 0.1945                    | 0.1527               | 0.2179                  | 0.2290                 | 0.2553                | 0.5082              |
| $\beta_1 + \beta_3$                              | -0.103***<br>(0.0380)     | -0.0303<br>(0.0314)  | -0.0372<br>(0.0267)     | -0.0167<br>(0.0259)    | -0.0586<br>(0.209)    | 0.0471<br>(0.0328)  |

Note: \*\*\* p<0.01, \*\* p<0.05, \* p<0.1. All regressions include course fixed effects, parallel course fixed effects for the courses taken at the same time, section size and students' characteristics (GPA, grade, nationality, field of study, age). Robust standard errors clustered at the section level are in parentheses. Control variables refer to students' characteristics.

TABLE B.6. Determinants of survey response.

|                                                  | (1)                   | (2)                   | (3)                   | (4)                   | (5)                   |
|--------------------------------------------------|-----------------------|-----------------------|-----------------------|-----------------------|-----------------------|
| Female instructor ( $\beta_1$ )                  |                       | -0.0003<br>(0.0044)   | -0.0067<br>(0.0052)   | -0.0067<br>(0.0053)   | -0.0083<br>(0.0060)   |
| Female student ( $\beta_2$ )                     | 0.0864***<br>(0.0037) | 0.0864***<br>(0.0037) | 0.0804***<br>(0.0046) | 0.0739***<br>(0.0048) | 0.0579***<br>(0.0054) |
| Female instructor * Female student ( $\beta_3$ ) |                       |                       | 0.0170**<br>(0.0076)  | 0.0174**<br>(0.0078)  | 0.0181**<br>(0.0090)  |
| Grade (first sit)                                |                       |                       |                       |                       | 0.0167***<br>(0.0015) |
| GPA                                              |                       |                       |                       |                       | 0.0437***<br>(0.0023) |
| German                                           |                       |                       |                       | 0.0636***<br>(0.0045) | 0.0171***<br>(0.0052) |
| Other nationality                                |                       |                       |                       | 0.0710***<br>(0.0057) | 0.0627***<br>(0.0067) |
| Economics                                        |                       |                       |                       | -0.0140<br>(0.0124)   | -0.0063<br>(0.0135)   |
| Other study field                                |                       |                       |                       | 0.0782***<br>(0.0196) | 0.0809***<br>(0.0248) |
| Age                                              |                       |                       |                       | -0.0004<br>(0.0011)   | 0.0080***<br>(0.0014) |
| Section size                                     |                       |                       |                       | 0.0004<br>(0.0016)    | 0.0009<br>(0.0018)    |
| Constant                                         | 0.3305***<br>(0.0021) | 0.3306***<br>(0.0026) | 0.3328***<br>(0.0028) | 0.6316***<br>(0.2161) | 0.0610<br>(0.1294)    |
| Observations                                     | 75,330                | 75,330                | 75,330                | 72,376                | 55,856                |
| R-squared                                        | 0.0580                | 0.0580                | 0.0580                | 0.0790                | 0.0878                |
| $\beta_1 + \beta_3$                              |                       |                       | 0.0103<br>(0.00659)   | 0.0107<br>(0.00675)   | 0.00985<br>(0.00758)  |

Note: \*\*\*  $p < 0.01$ , \*\*  $p < 0.05$ , \*  $p < 0.1$ . Dependent variable: Dummy variable for survey response. All regressions include course fixed effects and parallel course fixed effects for the courses taken at the same time. Robust standard errors clustered at the section level are in parentheses.

TABLE B.7. Selection of students into response (Heckman selection model)

|                                                  | (1)                    | (2)                    | (3)                    | (4)                    | (5)                    |
|--------------------------------------------------|------------------------|------------------------|------------------------|------------------------|------------------------|
|                                                  | Instructor evaluation  | Response               | Instructor evaluation  | Response               | Instructor evaluation  |
| Female instructor ( $\beta_1$ )                  | -0.2190***<br>(0.0299) | -0.0234<br>(0.0172)    | -0.2194***<br>(0.0300) | -0.0243<br>(0.0192)    | -0.2185***<br>(0.0305) |
| Female student ( $\beta_2$ )                     | -0.1160***<br>(0.0175) | 0.1666***<br>(0.0146)  | -0.1260***<br>(0.0178) | 0.0740***<br>(0.0162)  | -0.1191***<br>(0.0179) |
| Female instructor * Female student ( $\beta_3$ ) | 0.1380***<br>(0.0312)  | 0.0511**<br>(0.0246)   | 0.1374***<br>(0.0316)  | 0.0519*<br>(0.0271)    | 0.1371***<br>(0.0318)  |
| Mean past response                               |                        |                        |                        | 1.7841***<br>(0.0184)  |                        |
| Constant                                         | 0.1400<br>(0.1999)     | -1.9086***<br>(0.1044) | 0.2830<br>(0.2067)     | -2.1331***<br>(0.1188) | 0.1985<br>(0.2030)     |
| $\rho$                                           | 0.0295**<br>(0.0141)   |                        | -0.0497***<br>(0.0187) |                        |                        |
| $\ln \sigma$                                     | -0.0626***<br>(0.0081) |                        | -0.0608***<br>(0.0082) |                        |                        |
| Observations                                     | 55,856                 |                        | 54,530                 |                        | 19,952                 |
| Pseudo $R$ -squared                              | 0.0573                 |                        | 0.2331                 |                        | 0.1682                 |
| $\beta_1 + \beta_3$                              |                        | -0.0809**<br>(0.0335)  |                        | -0.0820**<br>(0.0337)  | -0.0814**<br>(0.0341)  |

Note: \*\*\*,  $p < 0.01$ , \*\*,  $p < 0.05$ , \*  $p < 0.1$ . All regressions include course fixed effects; the regression shown in column (5) also includes parallel course fixed effects for the courses taken at the same time. Column (5) also includes individual FE. Robust standard errors clustered at the section level are in parentheses. All regressions include course fixed effects, section size and students' characteristics (GPA, grade, nationality, field of study, age). Due to the large number of dummy variables, the regressions presented in this table do not contain parallel course fixed effects for the courses taken at the same time. Control variables refer to students' characteristics.

TABLE B.8. Instructor gender and instructor characteristics.

|                 | (1)<br>Female instructor |
|-----------------|--------------------------|
| PhD Student     | 0.0265<br>(0.1013)       |
| Lecturer        | 0.1034<br>(0.1098)       |
| Professor       | 0.0101<br>(0.1116)       |
| Age             | -0.0113***<br>(0.0032)   |
| Non-Dutch       | 0.0695<br>(0.0538)       |
| Full-time       | -0.1269**<br>(0.0644)    |
| Research fellow | -0.0331<br>(0.0741)      |
| Constant        | 0.7348***<br>(0.1332)    |
| Observations    | 377                      |
| R-squared       | 0.0921                   |

Note: \*\*\*  $p < 0.01$ , \*\*  $p < 0.05$ , \*  $p < 0.1$ . Dependent variable: Female instructor. Omitted category: student instructors. Standard errors are in parentheses.

TABLE B.9. Effect of instructors gender on students' study hours for male students ( $\beta_1$ ; Panel 1) and female students ( $\beta_1 + \beta_3$ ; Panel 2) depending on instructor and student seniority

|                                                                  | → Increasing Instructor Seniority → |             |           |           | Overall |
|------------------------------------------------------------------|-------------------------------------|-------------|-----------|-----------|---------|
|                                                                  | Student                             | PhD student | Lecturer  | Professor |         |
| <i>Panel 1: Male Students (<math>\beta_1</math>)</i>             |                                     |             |           |           |         |
| 1st year Bachelor                                                | -.4427                              | -.9951      | .7791     | -.7783    | -.1223  |
| 2nd year Bachelor and higher                                     | .6486                               | -1.638**    | .2562     | .3307     | .0561   |
| Master                                                           | .9005                               | .8763       | .2837     | .2739     | .2381   |
| Overall                                                          | .0422                               | -.5641      | .5847*    | .3553     | .0443   |
| <i>Panel 2: Female Students (<math>\beta_1 + \beta_3</math>)</i> |                                     |             |           |           |         |
| 1st year Bachelor                                                | -.5078                              | .8947       | 1.0327    | -3.6357   | .0068   |
| 2nd year Bachelor and higher                                     | .0287                               | .6519       | -1.2892** | -.6845    | -.1887  |
| Master                                                           | 2.2919                              | -.5425      | -.101     | 1.9685    | .2086   |
| Overall                                                          | -.1798                              | .1756       | -.0659    | .7007     | -.0393  |
| <i>Panel 3: Number of observations</i>                           |                                     |             |           |           |         |
| 1st year Bachelor                                                | 2,183                               | 1,218       | 1,634     | 307       | 5,342   |
| 2nd year Bachelor and higher                                     | 2,515                               | 1,876       | 2,659     | 1,505     | 8,555   |
| Master                                                           | 654                                 | 1,707       | 1,407     | 2,287     | 6,055   |
| Overall                                                          | 5,352                               | 4,801       | 5,700     | 4,099     | 19,952  |

Note: \*\*\*  $p < 0.01$ , \*\*  $p < 0.05$ , \*  $p < 0.1$ . Dependent variable: Students' study hours. All estimates are based on regressions which include course fixed effects, parallel course fixed effects for the courses taken at the same time, section size and other control variables for students' characteristics (GPA, grade, nationality, field of study, age). Robust standard errors clustered at the section level are in parentheses.

TABLE B.10. Effect of instructors gender on grades for male students ( $\beta_1$ ; Panel 1) and female students ( $\beta_1 + \beta_3$ ; Panel 2) depending on instructor and student seniority

|                                                                  | → Increasing Instructor Seniority → |             |           |           | Overall |
|------------------------------------------------------------------|-------------------------------------|-------------|-----------|-----------|---------|
|                                                                  | Student                             | PhD student | Lecturer  | Professor |         |
| <i>Panel 1: Male Students (<math>\beta_1</math>)</i>             |                                     |             |           |           |         |
| 1st year Bachelor                                                | -.0218                              | -.0201      | .0067     | .0849     | -.0119  |
| 2nd year Bachelor and higher                                     | .0791                               | .0359       | -.0057    | .0337     | .0681   |
| Master                                                           | .245                                | .0469       | -.5009*** | -.0168    | -.0788  |
| Overall                                                          | .0419                               | .0241       | -.092     | .0751     | .0109   |
| <i>Panel 2: Female Students (<math>\beta_1 + \beta_3</math>)</i> |                                     |             |           |           |         |
| 1st year Bachelor                                                | .0788                               | -.0383      | -.1035    | -.2202    | -.0091  |
| 2nd year Bachelor and higher                                     | .1210                               | -.1954      | .0582     | .0515     | .0546   |
| Master                                                           | .0900                               | -.0157      | -.1449    | .1882     | .0188   |
| Overall                                                          | .1000*                              | -.0795      | .0123     | .1163     | .0397   |
| <i>Panel 3: Number of observations</i>                           |                                     |             |           |           |         |
| 1st year Bachelor                                                | 2183                                | 1,218       | 1,634     | 307       | 5,342   |
| 2nd year Bachelor and higher                                     | 2,515                               | 1,876       | 2,659     | 1,505     | 8,555   |
| Master                                                           | 654                                 | 1,707       | 1,407     | 2,287     | 6,055   |
| Overall                                                          | 5,352                               | 4,801       | 5,700     | 4,099     | 19,952  |

Note: \*\*\*  $p < 0.01$ , \*\*  $p < 0.05$ , \*  $p < 0.1$ . Dependent variable: Course grades. All estimates are based on regressions which include course fixed effects, parallel course fixed effects for the courses taken at the same time, section size and other control variables for students' characteristics (GPA, nationality, field of study, age). Robust standard errors clustered at the section level are in parentheses.

TABLE B.11. Value added, instructor gender, and students' evaluations

|                               | (1)                   | (2)                 | (3)                   | (4)                |
|-------------------------------|-----------------------|---------------------|-----------------------|--------------------|
| Female instructor             | -0.0380<br>(0.0511)   | -0.0113<br>(0.0515) |                       |                    |
| Students' evaluations         |                       |                     | 0.0142<br>(0.0386)    | 0.0051<br>(0.0385) |
| Constant                      | 0.0856***<br>(0.0307) | 0.0260<br>(0.0417)  | 0.0729***<br>(0.0249) | 0.0187<br>(0.0367) |
| Instructor seniority Controls | NO                    | YES                 | NO                    | YES                |
| Observations                  | 690                   | 688                 | 688                   | 687                |
| R-squared                     | 0.0008                | 0.0185              | 0.0002                | 0.0189             |

Note: \*\*\*  $p < 0.01$ , \*\*  $p < 0.05$ , \*  $p < 0.1$ . Dependent variable: Teacher value added. Standard errors are in parentheses. Unit of observation: instructor level.



TABLE B.12. Estimates of gender bias in students’ evaluations of male students ( $\beta_1$ ; Panel 1) and female students ( $\beta_1 + \beta_3$ ; Panel 2) depending on instructor and student seniority

|                                                                  | → Increasing Instructor Seniority → |             |          |           | Overall   |
|------------------------------------------------------------------|-------------------------------------|-------------|----------|-----------|-----------|
|                                                                  | Student                             | PhD student | Lecturer | Professor |           |
| <i>Panel 1: Male Students (<math>\beta_1</math>)</i>             |                                     |             |          |           |           |
| 1st year Bachelor                                                | -.1317                              | -.3521**    | -.1072   | .1001     | -.1275**  |
| 2nd year Bachelor and higher                                     | -.3478***                           | .1518       | -.0322   | .1404     | -.2404*** |
| Master                                                           | -.4691**                            | -.6316***   | .204     | -.0478    | -.2507*** |
| All students                                                     | -.2379***                           | -.2798***   | -.0392   | .085      | -.2069*** |
| <i>Panel 2: Female Students (<math>\beta_1 + \beta_3</math>)</i> |                                     |             |          |           |           |
| 1st year Bachelor                                                | -.1537                              | -.2629      | -.0403   | .4645     | -.0607    |
| 2nd year Bachelor and higher                                     | -.4016***                           | .2286*      | .1934*   | .3941     | -.0701    |
| Master                                                           | -.5383**                            | -.4601***   | .3482    | .0787*    | -.1179*   |
| All students                                                     | -.274***                            | -.1359      | .1232*   | .2583**   | -.076**   |
| <i>Panel 3: Number of observations</i>                           |                                     |             |          |           |           |
| 1st year Bachelor                                                | 2,183                               | 1,218       | 1,634    | 307       | 5,342     |
| 2nd year Bachelor and higher                                     | 2,515                               | 1,876       | 2,659    | 1,505     | 8,555     |
| Master                                                           | 654                                 | 1,707       | 1,407    | 2,287     | 6,055     |
| All students                                                     | 5,352                               | 4,801       | 5,700    | 4,099     | 19,952    |

Note: \*\*\*  $p < 0.01$ , \*\*  $p < 0.05$ , \*  $p < 0.1$ . Dependent variable: Instructor evaluation. All estimates are based on regressions which include course fixed effects, parallel course fixed effects for the courses taken at the same time, section size and other control variables for students’ characteristics (GPA, grade, nationality, field of study, age). Robust standard errors clustered at the section level are in parentheses.

TABLE B.13. Gender bias in instructor evaluation – by student’s course grade

| Student grades                                   | (1)<br>Quartile 1      | (2)<br>Quartile 2      | (3)<br>Quartile 3      | (4)<br>Quartile 4      |
|--------------------------------------------------|------------------------|------------------------|------------------------|------------------------|
| Female instructor ( $\beta_1$ )                  | -0.1788***<br>(0.0471) | -0.2061***<br>(0.0539) | -0.2102***<br>(0.0621) | -0.1969***<br>(0.0719) |
| Female student ( $\beta_2$ )                     | -0.0914***<br>(0.0337) | -0.0805**<br>(0.0382)  | -0.2042***<br>(0.0456) | -0.1272**<br>(0.0584)  |
| Female instructor * Female student ( $\beta_3$ ) | 0.0527<br>(0.0602)     | 0.1307*<br>(0.0672)    | 0.1884**<br>(0.0773)   | 0.1152<br>(0.0986)     |
| Constant                                         | 0.3489<br>(0.6040)     | 0.9507**<br>(0.4142)   | 0.0746<br>(0.6777)     | -0.8966<br>(0.7197)    |
| Observations                                     | 7,004                  | 5,238                  | 4,548                  | 3,162                  |
| R-squared                                        | 0.2776                 | 0.2933                 | 0.3068                 | 0.3374                 |
| $\beta_1 + \beta_3$                              | -0.126**<br>(0.0565)   | -0.0753<br>(0.0596)    | -0.0219<br>(0.0647)    | -0.0817<br>(0.0855)    |

Note: \*\*\*  $p < 0.01$ , \*\*  $p < 0.05$ , \*  $p < 0.1$ . Dependent variable: Instructor evaluation. Quartiles are based on the student’s grade in the course and are calculated at the course level. All regressions include course fixed effects, parallel course fixed effects for the courses taken at the same time, section size and other control variables for students’ characteristics (GPA, grade, nationality, field of study, age). Robust standard errors clustered at the section level are in parentheses.
